# Supplementary material for: In Pancreatic Adenocarcinoma Alpha-Synuclein Increases and Marks Peri-Neural Infiltration
Source: MDPI journal article supplement (doi:10.3390/ijms23073775), 2022-03-29
Supplement: s1 [file s1]

## Supplementary Materials

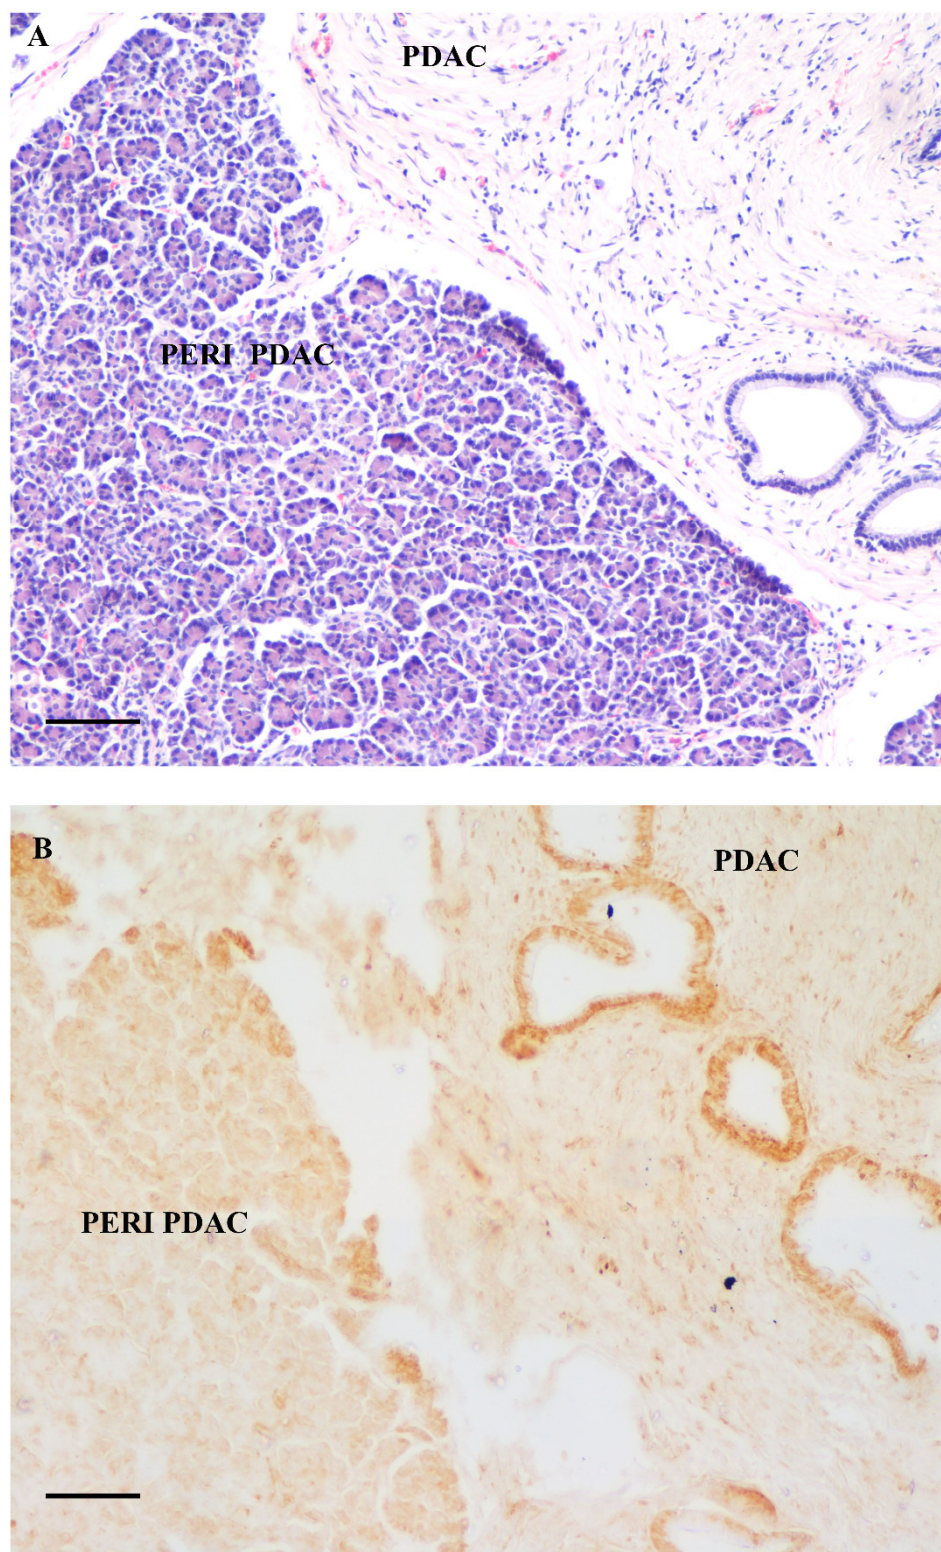

**Supplementary Figure S1.** Two whipple resections showing normal pancreatic tissue at the edge with PDAC. (A) Hematoxylin and Eosin- and (B)  $\alpha$ -syn immunoperoxidase-stained tissue are

shown. In both pictures, the normal architecture of pancreatic tissue (PERI PDAC) is evident on the left, while PDAC tissue is shown on the right. Scale bar=50  $\mu$ m.

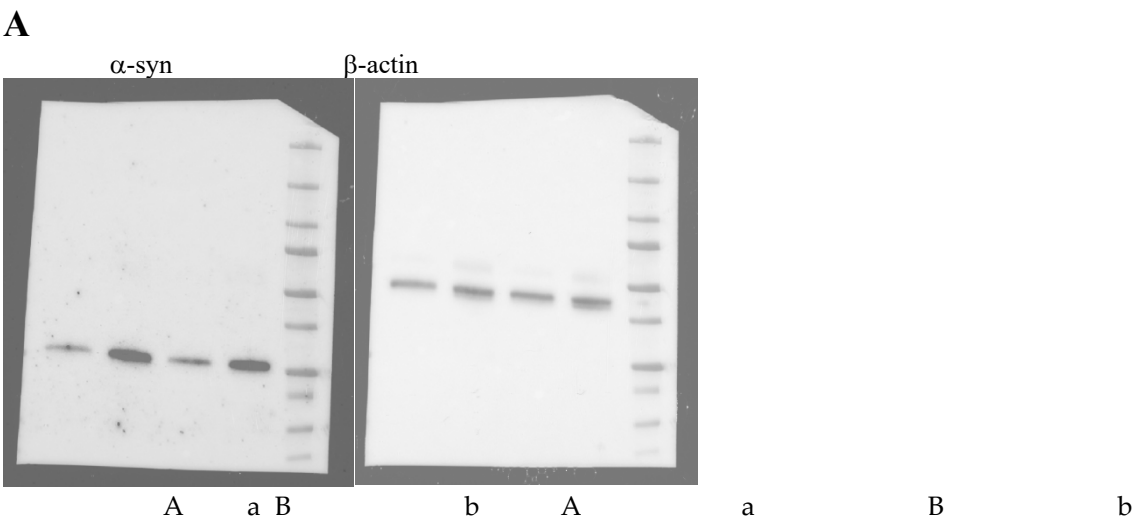

Western blot  $\alpha$ -syn and  $\beta$ -actin :

- Aextra PDAC patient 1
- aPDAC patient 1
- Bextra PDAC patient 2
- bPDAC patient 2

B

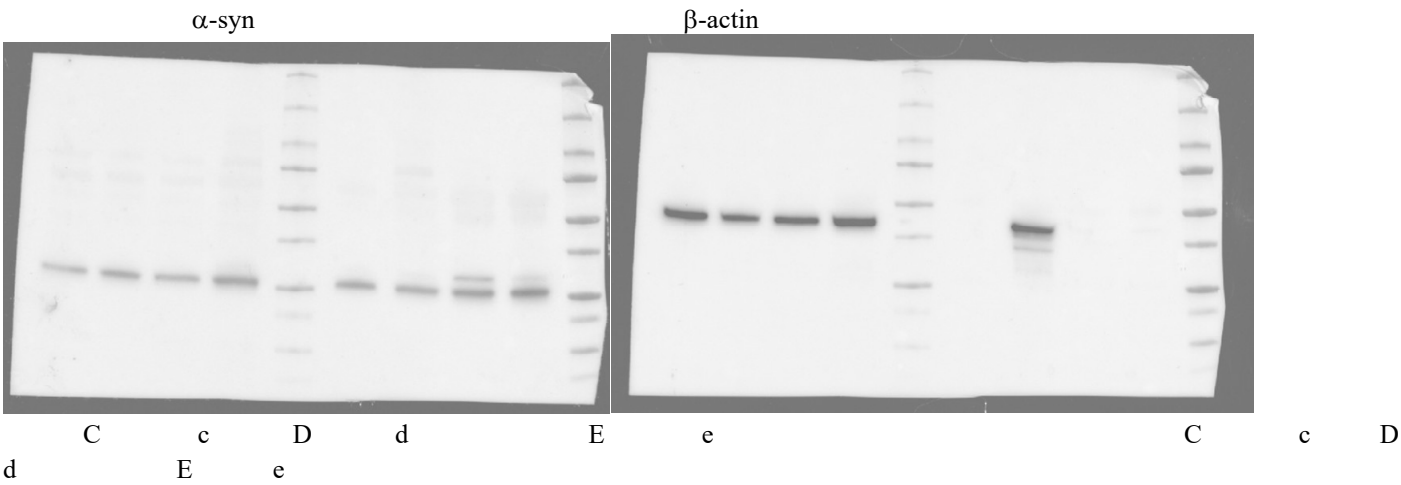

Western blot  $\alpha$ -syn and  $\beta$ -actin :

- C extra PDAC patient 3
- c PDAC patient 3
- D extra PDAC patient 4
- d PDAC patient 4
- E extra PDAC patient 5
- e PDAC patient 5

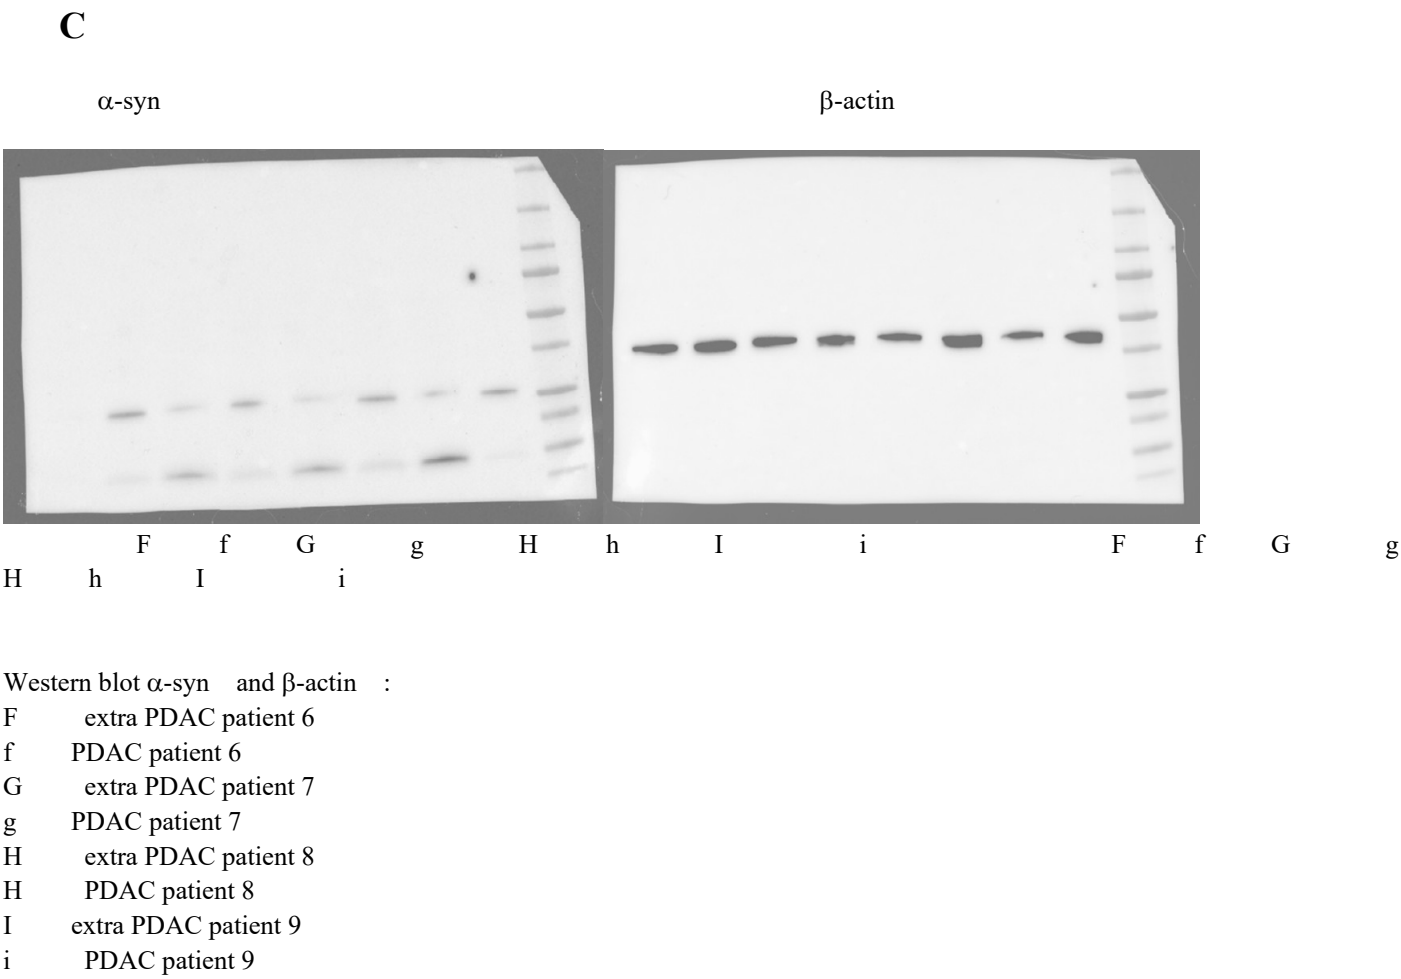

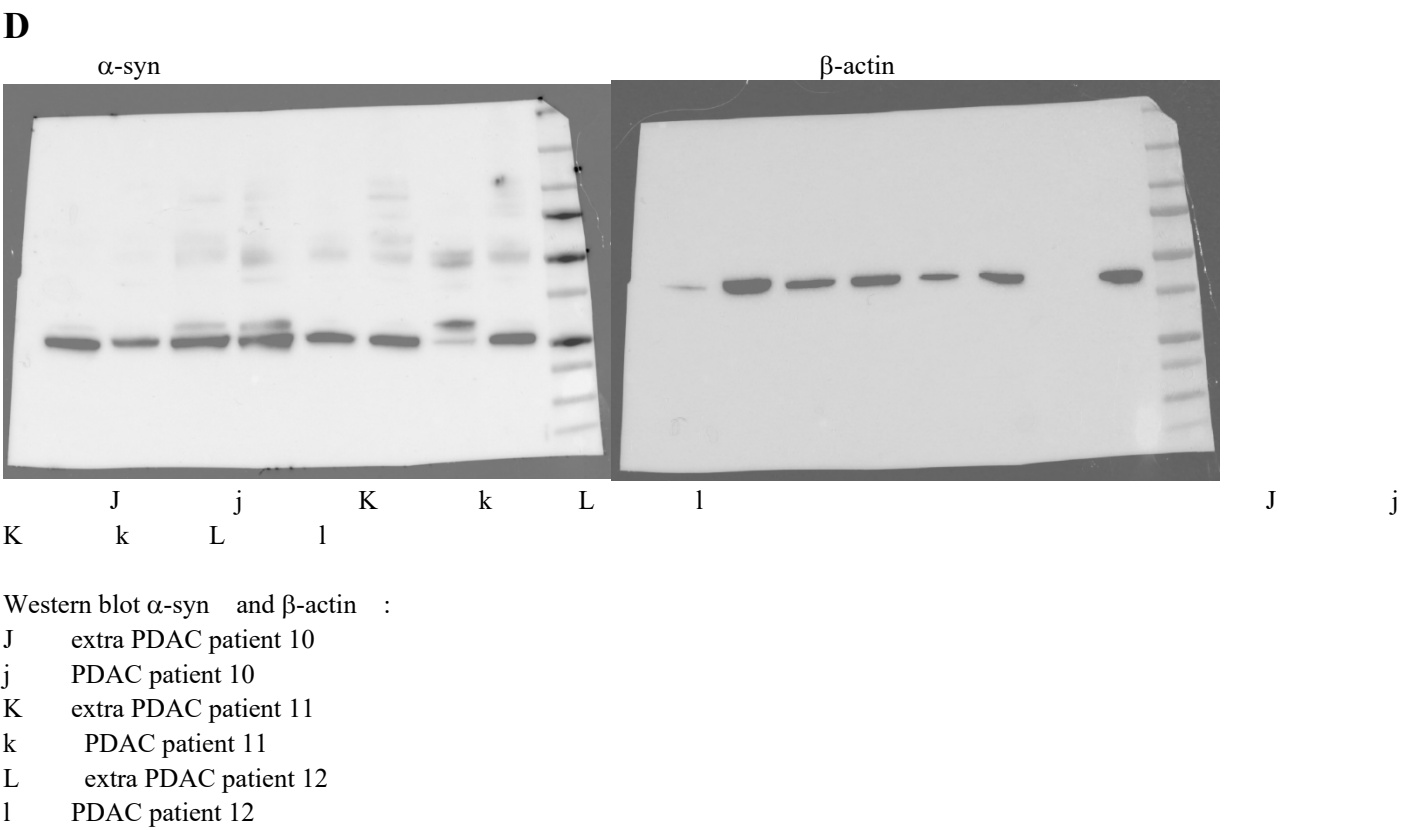

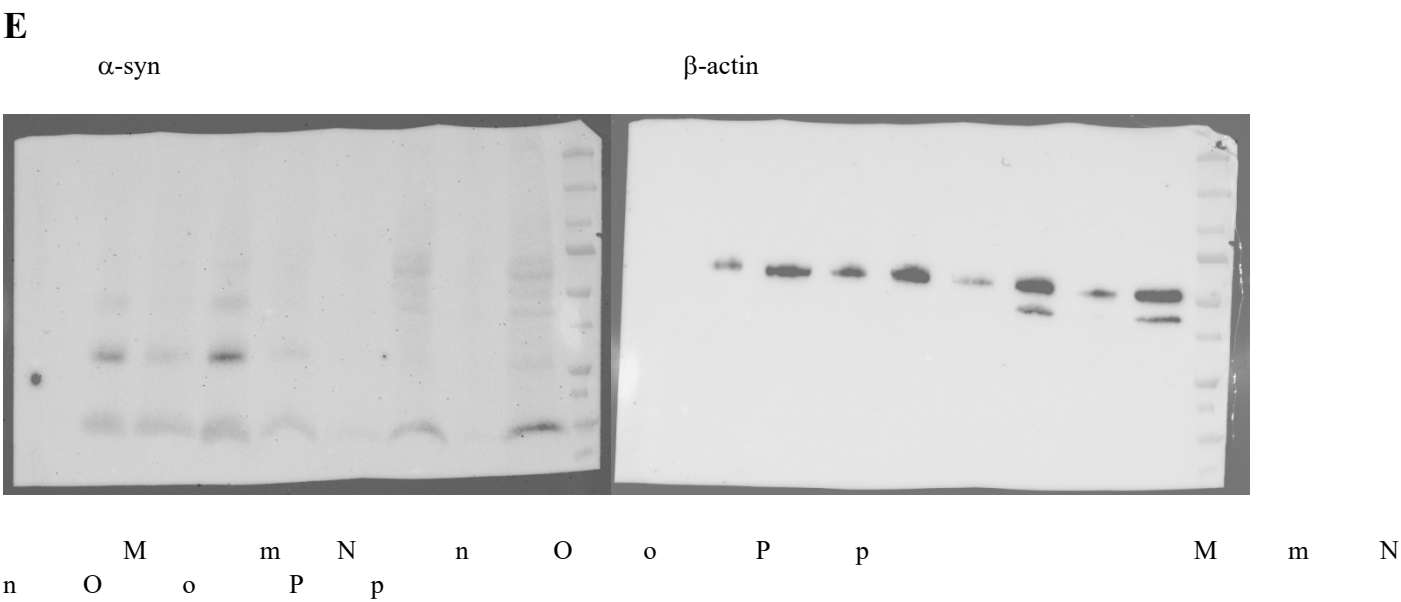

Western blot  $\alpha$ -syn and  $\beta$ -actin :

M extra PDAC patient 13  
m PDAC patient 13  
N extra PDAC patient 14  
n PDAC patient 14  
O extra PDAC patient 15  
o PDAC patient 15  
P extra PDAC patient 16  
p PDAC patient 16

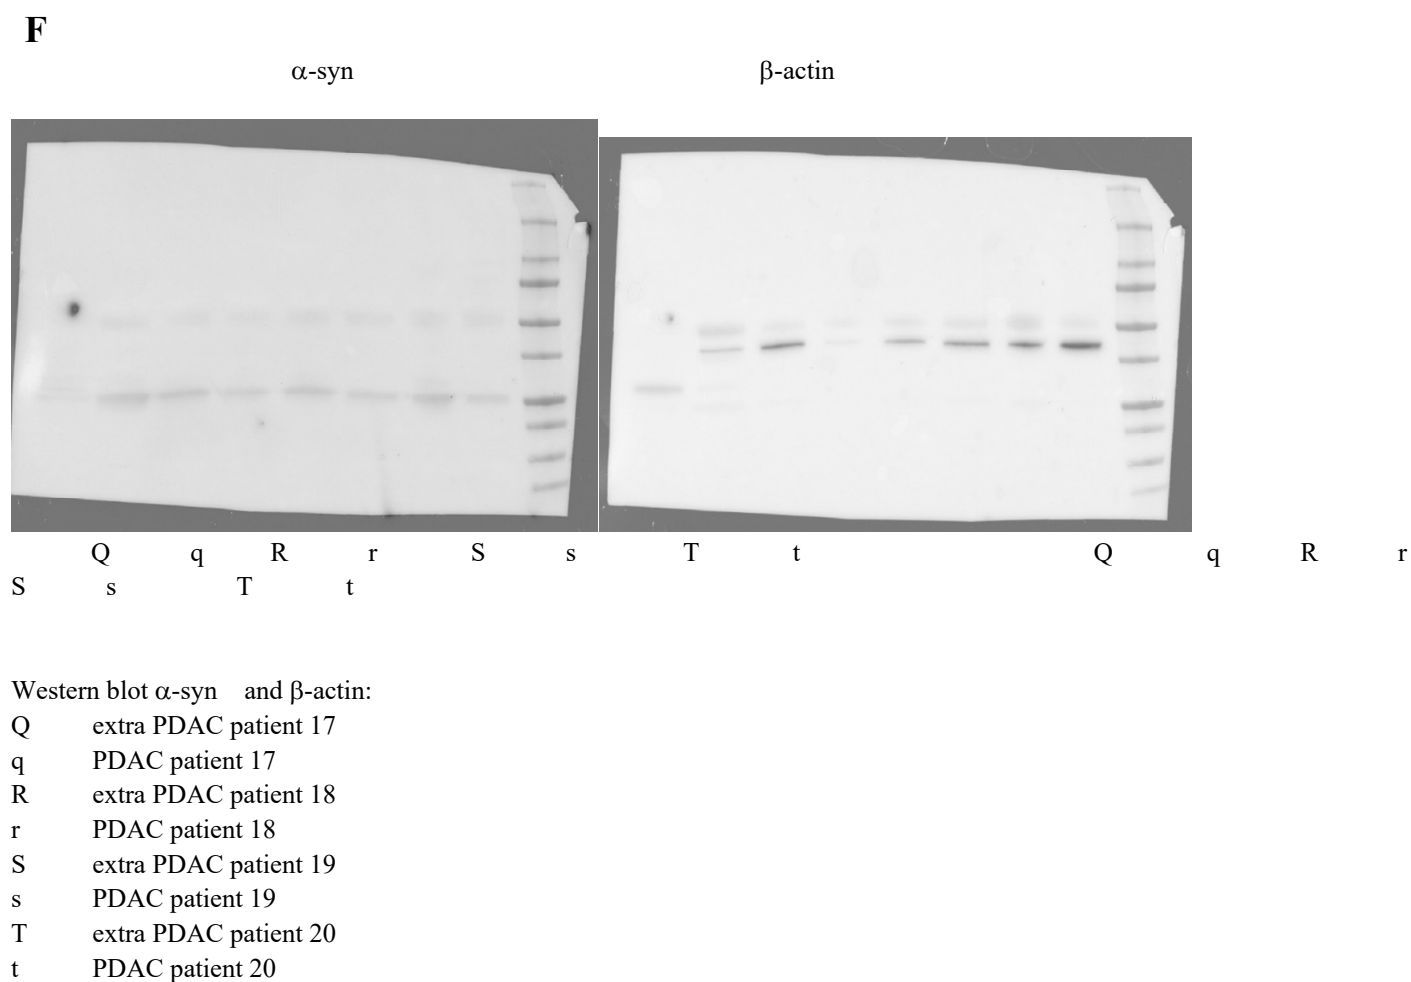

**Supplementary Figure S2.** Western blots for  $\alpha$ -syn from patients 1 and 2 (**A**), patients 3, 4 and 5 (**B**), patients 6, 7, 8 and 9 (**C**), patients 10, 11 and 12 (**D**), patients 13, 14, 15 and 16 (**E**) and patients 17, 18, 19, and 20 (**F**).
